# Supplementary material for: Self-assembly mechanism of thiol, dithiol, dithiocarboxylic acid, disulfide and diselenide on gold: an electrochemical impedance study
Source: Royal Society of Chemistry journal article supplement (doi:10.1039/c3cp51804c), 2013-01-01
Supplement: c3cp51804c.pdf [file c3cp51804c.pdf]

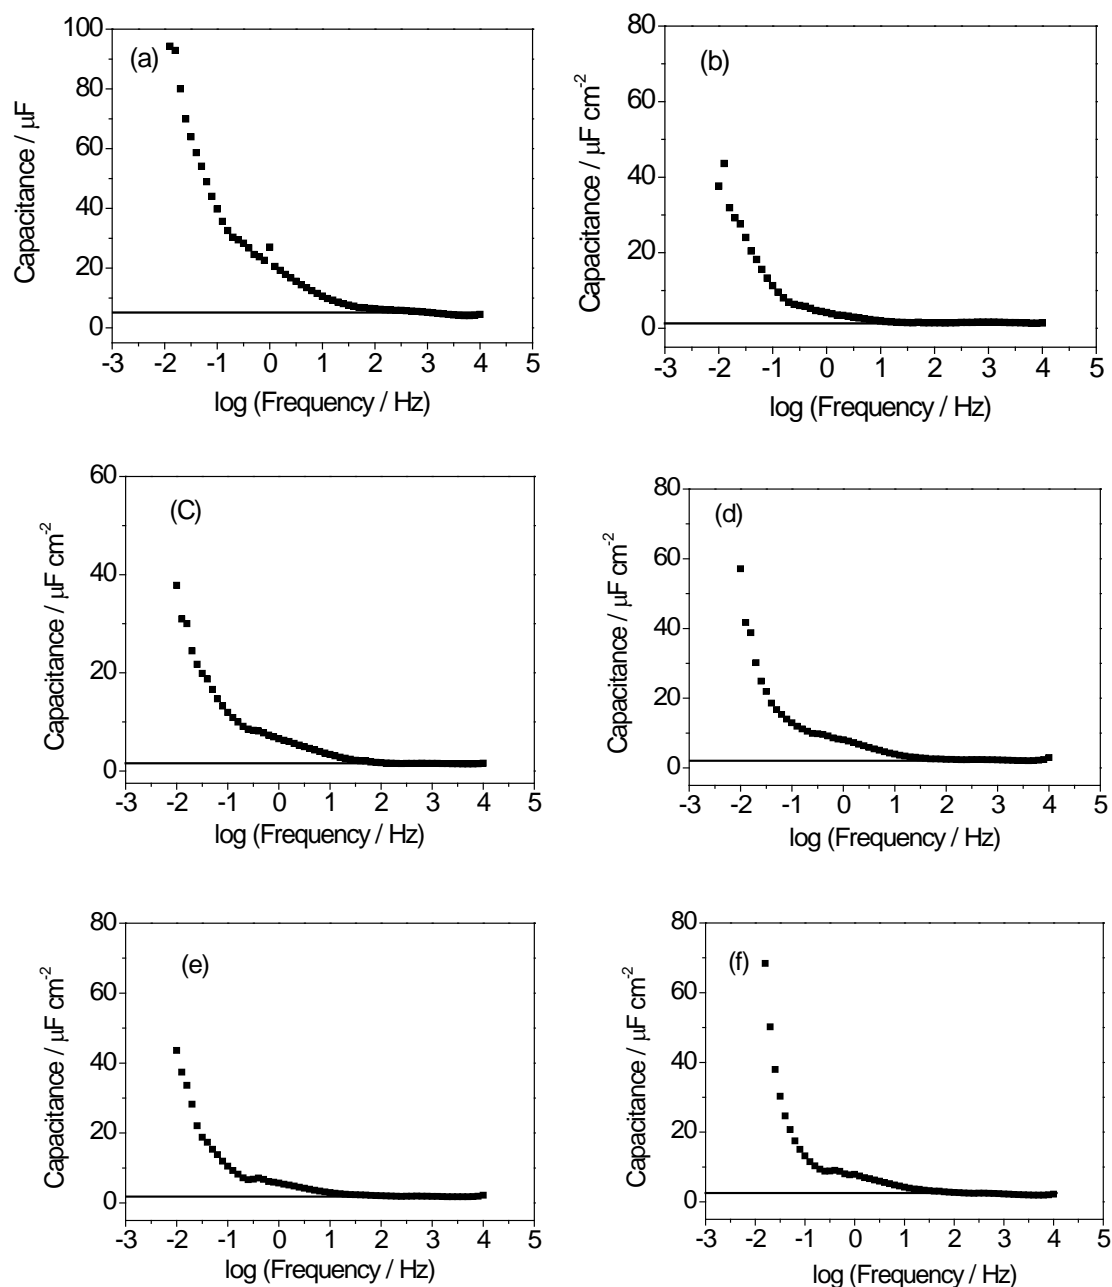

Figure S1: Capacitance vs log frequency curve recorded for gold in (a): ethanol + 0.1 M  $\text{LiClO}_4$  solution, (b): ethanol + 0.1 M  $\text{LiClO}_4$  + 20  $\mu\text{M}$  RSH solution, (c): ethanol + 0.1 M  $\text{LiClO}_4$  + 20  $\mu\text{M}$   $\text{R}(\text{SH})_2$  solution, (d): ethanol + 0.1 M  $\text{LiClO}_4$  + 20  $\mu\text{M}$   $\text{RS}_2\text{H}$  solution, (e): ethanol + 0.1 M  $\text{LiClO}_4$  + 20  $\mu\text{M}$  RSSR solution, (f): ethanol + 0.1 M  $\text{LiClO}_4$  + 20  $\mu\text{M}$  RSeSeR solution. Constant capacitance plateau is shown in each figure.

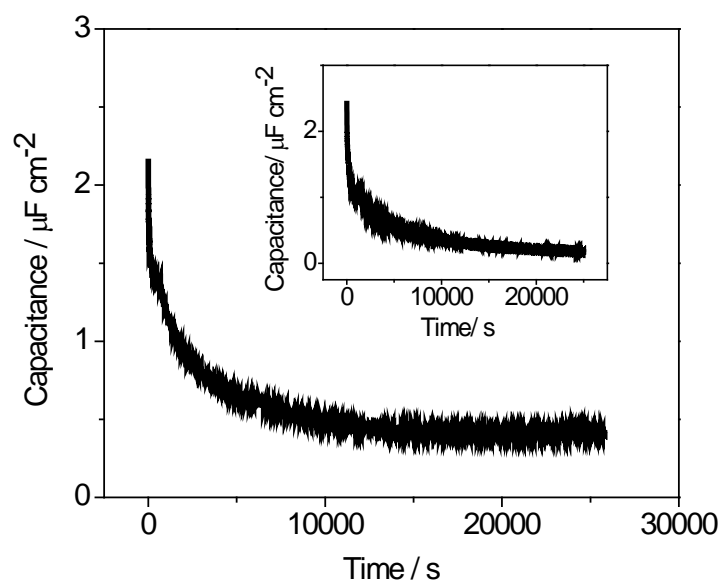

Figure S2: Capacitance vs time curve in 5 mM  $\text{RS}_2\text{H}$  solution recorded under Ar atmosphere for the Cu which was subjected to oxidation in air after its electro-reduction under Ar atmosphere. Inset shows the capacitance vs time curve in 5 mM  $\text{RS}_2\text{H}$  solution for the Cu which was electro-reduced and studied under Ar atmosphere without exposure to atmospheric air at any time. Solvent: ethanol, supporting electrolyte: 0.1 M  $\text{LiClO}_4$ .

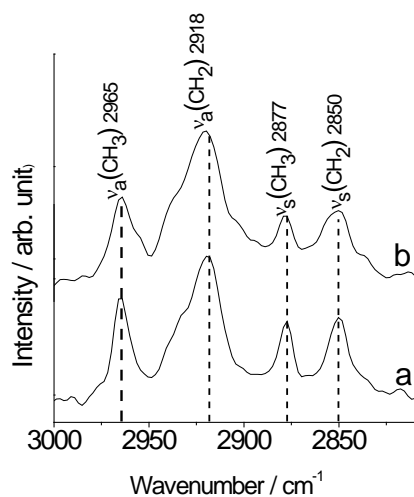

Figure S3. PM-IRRAS spectra recorded for the monolayers derived from RSSR (a), RSeSeR (b) on Au. The spectra were recorded for the monolayers prepared for 7 hours from 1 mM solution.

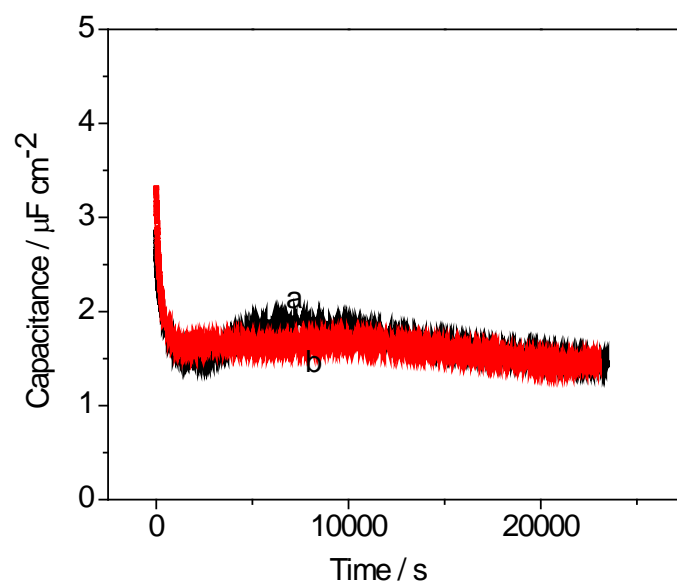

Figure S4: Capacitance vs time curves in 5 mM RSeSeR solution recorded for the Cu which was subjected to oxidation in air after its electro-reduction under Ar atmosphere (a) and for the Cu which was electro-reduced and studied under Ar atmosphere without exposure to atmospheric air at any time (b). Solvent: ethanol, supporting electrolyte: 0.1 M LiClO<sub>4</sub>.

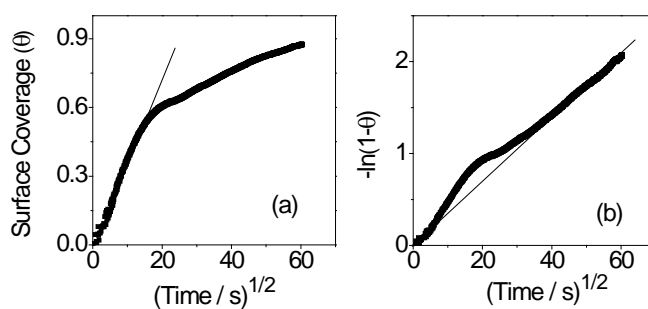

Figure S5. The kinetic fittings for the adsorption from 0.1  $\mu\text{M}$  RSH solution. The initial adsorption follows diffusion controlled kinetics or diffusion controlled Langmuir model. Thereafter adsorption does not follow any of the studied kinetic models for a time interval corresponding to the intermediate capacitance stage. Thereafter, adsorption follows diffusion limited Langmuir model.

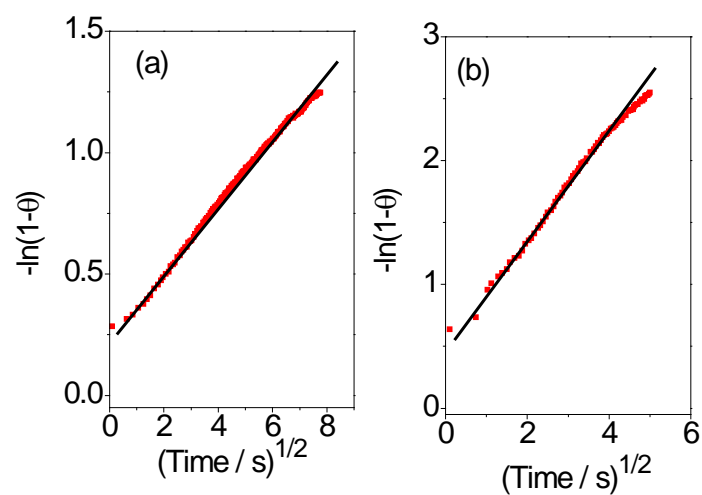

Figure S6. The kinetic fittings for the adsorption from 10 (a) and 20  $\mu\text{M}$  (b) RSSR solutions.

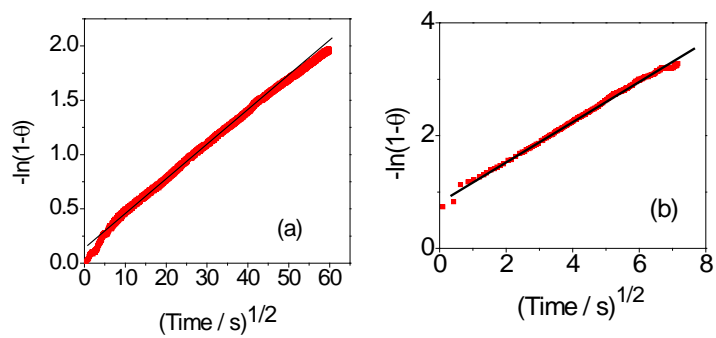

Figure S7. Fitting with diffusion controlled Langmuir model for the adsorption on Au from 0.1  $\mu\text{M}$  RSeSeR solution (a) and 20  $\mu\text{M}$  RSeSeR solution (b).
